# Supplementary material for: Common Secondary Genomic Variants Associated With Advanced Epithelioid Hemangioendothelioma
Source: PubMed Central journal article supplement (PMC6777396; doi:10.1001/jamanetworkopen.2019.12416), 2019-10-02
Supplement: jamanetwopen-2-e1912416-s001.pdf [file jamanetwopen-2-e1912416-s001.pdf]

## Supplementary Online Content

Seligson ND, Awasthi A, Millis SZ, et al. Common secondary genomic variants associated with advanced epithelioid hemangioendothelioma. *JAMA Netw Open*. 2019;2(10):e1912416. doi:10.1001/jamanetworkopen.2019.12416

**eTable 1.** Genomic Coverage of Next-Generation Sequencing Platform

**eTable 2.** Description of Pathways

**eFigure 1.** Distribution of Genomic *WWTR1-CAMTA1* Fusion Expression

**eTable 3.** Gene Variants in EHE

**eFigure 2.** Age at Diagnosis

**eMethods.** Models

**eTable 4.** Clinicogenomic Features of *CDKN2A/B* Variant Subjects

**eTable 5.** Targetable Genomic Variants

This supplementary material has been provided by the authors to give readers additional information about their work.

eTable 1: Genomic Coverage of Next-Generation Sequencing Platform

| eTable 1: Genomic Coverage of Next-Generation Sequencing Platforms                                                                                                                                                                                                                                                                                               |                                                                                                                                                                                                                                                                                                                                                                                                                                                                                                                                                                                        |
|------------------------------------------------------------------------------------------------------------------------------------------------------------------------------------------------------------------------------------------------------------------------------------------------------------------------------------------------------------------|----------------------------------------------------------------------------------------------------------------------------------------------------------------------------------------------------------------------------------------------------------------------------------------------------------------------------------------------------------------------------------------------------------------------------------------------------------------------------------------------------------------------------------------------------------------------------------------|
| OMNISEQ ADVANCE                                                                                                                                                                                                                                                                                                                                                  | FOUNDATIONONE HEME                                                                                                                                                                                                                                                                                                                                                                                                                                                                                                                                                                     |
| Single Nucleotide Variants (SNVs), Insertions, Deletions, and Indels                                                                                                                                                                                                                                                                                             | Full Coding Sequence                                                                                                                                                                                                                                                                                                                                                                                                                                                                                                                                                                   |
| Hotspot                                                                                                                                                                                                                                                                                                                                                          | <i>ABL1, ACTB, AKT1, AKT2, AKT3, ALK, AMER1, (FAM123B, or, WTX),</i>                                                                                                                                                                                                                                                                                                                                                                                                                                                                                                                   |
| <i>ABL1, AKT1, ALK, AR, ARAF, BRAF, BTK, CBL, CDK4, CHEK2, CSF1R, CTNNB1, DDR2, DNMT3A, EGFR, ERBB2, ERBB3, ERBB4, ESR1, EZH2, FGFR1, FGFR2, FGFR3, FLT3, FOXL2, GATA2, GNA11, GNAQ, GNAS, HNF1A, HRAS, IDH1, IDH2, IFITM1, IFITM3, JAK1, JAK2, JAK3, KDR, KIT, KNSTRN, KRAS, MAGOH, MAP2K1, MAP2K2, MAPK1, MAX, MED12, MET, MLH1, MPL, MTOR, MYD88, NFE2L2,</i> | <i>APC, APH1A, AR, ARAF, ARFRP1, ARHGAP26, (GRAF), ARID1A, ARID2, ASMTL, ASXL1, ATM, ATR, ATRX, AURKA, AURKB, AXIN1, AXL, B2M, BAP1, BARD1, BCL10, BCL11B, BCL2, BCL2L2, BCL6, BCL7A, BCOR, BCORL1, BIRC3, BLM, BRAF, BRCA1, BRCA2, BRD4, BRIP1, (BACH1), BRSK1, BTG2, BTK, BTLA, C11, orf30, (EMSY), CAD, CALR, CARD11, CBFEB, CBL, CCND1, CCND2, CCND3, CCNE1, CCT6B, CD22, CD274, (PDL1), CD36, CD58, CD70, CD79A, CD79B, CDC73, CDH1, CDK12, CDK4, CDK6, CDK8, CDKN1B, CDKN2A, CDKN2B, CDKN2C, CEBPA, CHD2, CHEK1, CHEK2, CIC, CIITA, CKS1B, CPS1, CREBBP, CRKL, CRLF2, CSF1R,</i> |

|                                                                                                                                                                                   |                                                                                                                                                                                                                                                                                                                                                                                                                                                                                                                                                                                                                                                                          |
|-----------------------------------------------------------------------------------------------------------------------------------------------------------------------------------|--------------------------------------------------------------------------------------------------------------------------------------------------------------------------------------------------------------------------------------------------------------------------------------------------------------------------------------------------------------------------------------------------------------------------------------------------------------------------------------------------------------------------------------------------------------------------------------------------------------------------------------------------------------------------|
| <p><i>NPM1, NRAS, PAX5, PDGFRA, PIK3CA, PPP2R1A, PTPN11, RAC1, RAF1, RET, RHEB, RHOA, SF3B1, SMO, SPOP, SRC, STAT3, U2AF1, XPO1</i></p>                                           | <p><i>CSF3R, CTCF, CTNNA1, CTNNB1, CUX1, CXCR4, DAXX, DDR2, DDX3X, DNMT2, DNMT3A, DOT1L, DTX1, DUSP2, DUSP9, EBF1, ECT2L, EED, EGFR, ELP2, EP300, EPHA3, EPHA5, EPHA7, EPHB1, ERBB2, ERBB3, ERBB4, ERG, ESR1, ETS1, ETV6, EXOSC6, EZH2,</i></p>                                                                                                                                                                                                                                                                                                                                                                                                                          |
| <p>Full Coding Sequence</p>                                                                                                                                                       | <p><i>FAF1, FAM46C, FANCA, FANCC, FANCD2, FANCE, FANCF, FANCG,</i></p>                                                                                                                                                                                                                                                                                                                                                                                                                                                                                                                                                                                                   |
| <p><i>APC, ATM, BAP1, BRCA1, BRCA2, CDH1, CDKN2A, FBXW7, GATA3, MSH2, NF1, NF2, NOTCH1, PIK3R1, PTCH1, PTEN, RB1, SMAD4, SMARCB1, STK11, TET2, TP53, TSC1, TSC2, VHL, WT1</i></p> | <p><i>FANCL, FAS, (TFRSF6), FBXO11, FBXO31, FBXW7, FGF10, FGF14, FGF19, FGF23, FGF3, FGF4, FGF6, FGFR1, FGFR2, FGFR3, FGFR4, FHIT, FLCN, FLT1, FLT3, FLT4, FLYWCH1, FOXL2, FOXO1, FOXO3, FOXP1, FRS2, GADD45B, GATA1, GATA2, GATA3, GID4, (C17orf39), GNA11, GNA12, GNA13, GNAQ, GNAS, GPR124, GRIN2A, GSK3B, GTSE1, HDAC1, HDAC4, HDAC7, HGF, HIST1H1C, HIST1H1D, HIST1H1E, HIST1H2AC, HIST1H2AG, HIST1H2AL, HIST1H2AM, HIST1H2BC, HIST1H2BJ, HIST1H2BK, HIST1H2BO, HIST1H3B, HNF1A, HRAS, HSP90AA1, ICK, ID3, IDH1, IDH2, IGF1R, KBKE, IKZF1, IKZF2, IKZF3, IL7R, INHBA, INPP4B, INPP5D, (SHIP), IRF1, IRF4, IRF8, IRS2, JAK1, JAK2, JAK3, JARID2, JUN, KAT6A,</i></p> |

*(MYST3), KDM2B, KDM4C, KDM5A, KDM5C, KDM6A, KDR, KEAP1, KIT, KLHL6, KMT2A, (MLL), KMT2C, (MLL3), KMT2D, (MLL2), KRAS, LEF1, LRP1B, LRRK2, MAF, MAFB, MAGED1, MALT1, MAP2K1, MAP2K2, MAP2K4, MAP3K1, MAP3K14, MAP3K6, MAP3K7, MAPK1, MCL1, MDM2, MDM4, MED12, MEF2B, MEF2C, MEN1, MET, MIB1, MITF, MKI67, MLH1, MPL, MRE11A, MSH2, MSH3, MSH6, MTOR, MUTYH, MYC, MYCL, (MYCL1), MYCN, MYD88, MYO18A, NCOR2, NCSTN, NF1, NF2, NFE2L2, NFKBIA, NKX2-1, NOD1, NOTCH1, NOTCH2, NPM1, NRAS, NT5C2, NTRK1, NTRK2, NTRK3, NUP93, NUP98, P2RY8, PAG1, PAK3, PALB2, PASK, PAX5, PBRM1, PC, PCBP1, PCLO, PDCD1, PDCD11, PDCD1LG2, (PDL2), PDGFRA, PDGFRB, PDK1, PHF6, PIK3CA, PIK3CG, PIK3R1, PIK3R2, PIM1, PLCG2, POT1, PPP2R1A, PRDM1, PRKAR1A, PRKDC, PRSS8, PTCH1, PTEN, PTPN11, PTPN2, PTPN6, (SHP-1), PTPRO, RAD21, RAD50, RAD51, RAF1, RARA, RASGEF1A, RB1, RELN, RET, RHOA, RICTOR, RNF43, ROS1, RPTOR, RUNX1, S1PR2, SDHA,SDHB,*

|                                                                                                                                                  |                                                                                                                                                                                                                                                                                                                                                                                                                                                                                                                                                                                             |
|--------------------------------------------------------------------------------------------------------------------------------------------------|---------------------------------------------------------------------------------------------------------------------------------------------------------------------------------------------------------------------------------------------------------------------------------------------------------------------------------------------------------------------------------------------------------------------------------------------------------------------------------------------------------------------------------------------------------------------------------------------|
|                                                                                                                                                  | <p><i>SDHC, SDHD, SERP2, SETBP1, SETD2, SF3B1, SGK1, SMAD2, SMAD4, SMARCA1, SMARCA4, SMARCB1, SMC1A, SMC3, SMO, SOCS1, SOCS2, SOCS3, SOX10, SOX2, SPEN, SPOP, SRC, SRSF2, STAG2, STAT3, STAT4, STAT5A, STAT5B, STAT6, STK11, SUFU, SUZ12, TAF1, TBL1XR1, TCF3, (E2A), TCL1A, (TCL1), TET2, TGFBR2, TLL2, TMEM30A, TMSB4XP8, (TMSL3), TNFAIP3, TNFRSF11A, TNFRSF14, TNFRSF17, TOP1, TP53, TP63, TRAF2, TRAF3, TRAF5, TSC1, TSC2, TSHR, TUSC3, TYK2, U2AF1, U2AF2, VHL, WDR90, WHSC1, (MMSET, or, NSD2), WISP3, WT1, XBP1, XPO1, YY1AP1, ZMYM3, ZNF217, ZNF24, (ZSCAN3), ZNF703, ZRSR</i></p> |
| Copy Number Gain                                                                                                                                 | DNA Rearrangements                                                                                                                                                                                                                                                                                                                                                                                                                                                                                                                                                                          |
| <p><i>ACVRL1, AKT1, APEX1, AR, ATP11B, BCL2L1, BCL9, BIRC2, BIRC3, CCND1, CCNE1, CD274, CD44, CDK4, CDK6, CSNK2A1, DCUN1D1, EGFR, ERBB2,</i></p> | <p><i>ALK, BCL2, BCL6, BCR, BRAF, CCND1, CRLF2, EGFR, EPOR, ETV1, ETV4, ETV5, ETV6, EWSR1, FGFR2, IGH, IGK, IGL, JAK1, JAK2, KMT2A, (MLL), MYC, NTRK1, PDGFRA, PDGFRB, RAF1, RARA, RET, ROS1, TMPRSS2, TRG</i></p>                                                                                                                                                                                                                                                                                                                                                                          |



*HOXA9, HOXC11, HOXC13, HOXD11, HOXD13, HSP90AA1, HSP90AB1, IGH, IGK, IGL, IKZF1, IL21R, IL3, IRF4, ITK, JAK1, JAK2, JAK3, JAZF1, KAT6A, (MYST3), KDSR, KIF5B, KMT2A, (MLL), LASP1, LCP1, LMO1, LMO2, LPP, LYL1, MAF, MAFB, MALT1, MDS2, MECOM, MKL1, MLF1, MLLT1, (ENL), MLLT10, (AF10), MLLT3, MLLT4, (AF6), MLLT6, MN1, MNX1, MSI2, MSN, MUC1, MYB, MYC, MYH11, MYH9, NACA, NBEAP1, (BCL8), NCOA2, NDRG1, NF1, NF2, NFKB2, NIN, NOTCH1, NPM1, NR4A3, NSD1, NTRK1, NTRK2, NTRK3, NUMA1, NUP214, NUP98, NUTM2A, OMD, P2RY8, PAFAH1B2, PAX3, PAX5, PAX7, PBX1, PCM1, PCSK7, PDCD1LG2, (PDL2), PDE4DIP, PDGFB, PDGFRA, PDGFRB, PER1, PHF1, PICALM, PIM1, PLAG1, PML, POU2AF1, PPP1CB, PRDM1, PRDM16, PRRX1, PSIP1, PTCH1, PTK7, RABEP1, RAF1, RALGDS, RAP1GDS1, RARA, RBM15, RET, RHOH, RNF213, ROS1, RPL22, RPN1, RUNX1, RUNX1T1, (ETO), RUNX2, SEC31A, SEPT5, SEPT6, SEPT9, SET, SH3GL1, SLC1A2, SNX29, (RUNDC2A), SRSF3, SS18,*

|  |                                                                                                                                                                                                                                                                                                             |
|--|-------------------------------------------------------------------------------------------------------------------------------------------------------------------------------------------------------------------------------------------------------------------------------------------------------------|
|  | <p><i>SSX1, SSX2, SSX4, STAT6, STL, SYK, TAF15, TAL1, TAL2, TBL1XR1, TCF3, (E2A), TCL1A, (TCL1), TEC, TET1, TFE3, TFG, TFPT, TFRC, TLX1, TLX3, TMPRSS2, TNFRSF11A, TOP1, TP63, TPM3, TPM4, TRIM24, TRIP11, TTL, TYK2, USP6, WHSC1, (MMSET, or, NSD2), WHSC1L1, YPEL5, ZBTB16, ZMYM2, ZNF384, ZNF521</i></p> |
|--|-------------------------------------------------------------------------------------------------------------------------------------------------------------------------------------------------------------------------------------------------------------------------------------------------------------|



eTable 2: Description of Pathways

| eTable 2: Description of Pathways |                   |                 |                |                  |                |                 |
|-----------------------------------|-------------------|-----------------|----------------|------------------|----------------|-----------------|
| Cell Cycle Regulation             | DNA Damage Repair | Epigenetics     |                | Growth Signaling |                | Other           |
| <i>CCND3</i>                      | <i>ABL1</i>       | <i>APC</i>      | <i>MED12</i>   | <i>ADGRA2</i>    | <i>INPP5D</i>  | <i>BCOR</i>     |
| <i>CDKN2A</i>                     | <i>BAP1</i>       | <i>ATRX</i>     | <i>PCBP1</i>   | <i>ALK</i>       | <i>LRRK2</i>   | <i>CASP8</i>    |
| <i>CDKN2B</i>                     | <i>BARD1</i>      | <i>AXIN1</i>    | <i>RARA</i>    | <i>AR</i>        | <i>MAP2K2</i>  | <i>CIITA</i>    |
| <i>DKC1</i>                       | <i>BRCA1</i>      | <i>BCORL1</i>   | <i>RPS19</i>   | <i>ASXL1</i>     | <i>MAP3K1</i>  | <i>CRBN</i>     |
| <i>MEF2B</i>                      | <i>BRCA2</i>      | <i>EED</i>      | <i>RUNX1</i>   | <i>CCT6B</i>     | <i>MAP3K13</i> | <i>ECT2L</i>    |
| <i>MKI67</i>                      | <i>CHEK2</i>      | <i>HIST1H1E</i> | <i>SETBP1</i>  | <i>CD36</i>      | <i>MYO18A</i>  | <i>FAS</i>      |
| <i>NUP98</i>                      | <i>FANCA</i>      | <i>JARID2</i>   | <i>SMARCA4</i> | <i>CPS1</i>      | <i>NCOR1</i>   | <i>FAT3</i>     |
| <i>POT1</i>                       | <i>FANCL</i>      | <i>KDM4C</i>    | <i>TAF1</i>    | <i>CSF1R</i>     | <i>NCOR2</i>   | <i>FBXO31</i>   |
| <i>RB1</i>                        | <i>MLH1</i>       | <i>KDM5C</i>    | <i>TCF3</i>    | <i>DDX3X</i>     | <i>NOTCH1</i>  | <i>FBXW7</i>    |
| <i>RELN</i>                       | <i>MSH2</i>       | <i>KMT2A</i>    | <i>TERT</i>    | <i>DTX1</i>      | <i>NOTCH2</i>  | <i>GATA3</i>    |
| <i>SGK1</i>                       | <i>MSH3</i>       | <i>KMT2C</i>    | <i>TET2</i>    | <i>EPHA3</i>     | <i>NOTCH3</i>  | <i>IKZF3</i>    |
| <i>SMC1A</i>                      | <i>MUTYH</i>      | <i>KMT2D</i>    | <i>TOP1</i>    | <i>EPHB1</i>     | <i>NTRK1</i>   | <i>KEAP1</i>    |
|                                   | <i>PMS2</i>       | <i>LRP1B</i>    | <i>YY1AP1</i>  | <i>ERBB2</i>     | <i>PASK</i>    | <i>NFKBIA</i>   |
|                                   | <i>RAD50</i>      | <i>TET2</i>     | <i>ZNF217</i>  | <i>FGF4</i>      | <i>PC</i>      | <i>NOD1</i>     |
|                                   | <i>RAD51C</i>     |                 | <i>ZNF703</i>  | <i>GNAS</i>      | <i>PIK3CA</i>  | <i>PDCD1LG2</i> |
|                                   |                   |                 |                | <i>HGF</i>       | <i>PTCH1</i>   | <i>TP63</i>     |
|                                   |                   |                 |                | <i>HSP90</i>     | <i>RICTOR</i>  | <i>TRAF3</i>    |
|                                   |                   |                 |                | <i>ICK</i>       | <i>ROS1</i>    |                 |

|  |  |  |  |                             |                                           |  |
|--|--|--|--|-----------------------------|-------------------------------------------|--|
|  |  |  |  | <i>IDH1</i><br><i>IGF1R</i> | <i>TSC1</i><br><i>TSC2</i><br><i>TYK2</i> |  |
|--|--|--|--|-----------------------------|-------------------------------------------|--|

eFigure 1: Distribution of Genomic *WWTR1-CAMTA1* Fusion Expression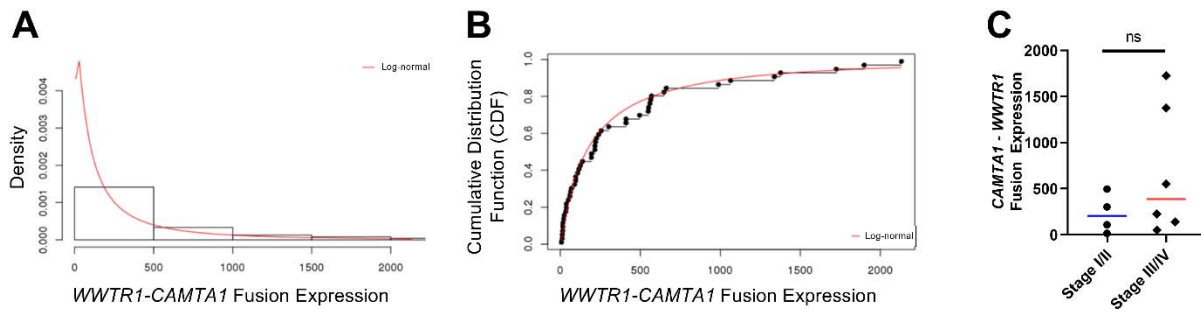

**A,B)** Fusion expression data from 45 subjects with *WWTR1-CAMTA1* fusion data available. *WWTR1-CAMTA1* fusion expression demonstrated a right-skewed, log-normal distribution (**A**) corroborated by the plot between empirical and theoretical cumulative distribution function (CDF; **B**). **C**) In a clinical cohort of 10 subjects with *WWTR1-CAMTA1* fusion data available, subjects with stage III/IV disease demonstrated a non-significant trend towards increased expression of the *WWTR1-CAMTA1* fusion ( $677 \pm 706$  vs  $231 \pm 213$  copies;  $p=0.2$ ).

eTable 3: Gene Variants in EHE

| etable 3: Gene Variants in EHE |                      |                          |
|--------------------------------|----------------------|--------------------------|
| Gene                           | Description          | Variant Call             |
| <i>ABL1</i>                    | A1102V               | Unknown<br>Pathogenicity |
| <i>ADGRA2</i>                  | P1115_S1116insTGEGPP | Unknown<br>Pathogenicity |
| <i>ALK - ALK</i>               | deletion             | Unknown<br>Pathogenicity |
| <i>APC</i>                     | Q1045*               | Known<br>Pathogenicity   |
| <i>APC</i>                     | I1307K               | Known<br>Pathogenicity   |
| <i>APC</i>                     | 3920T>A              | Known<br>Pathogenicity   |
| <i>APC</i>                     | Q1549K               | Unknown<br>Pathogenicity |
| <i>AR</i>                      | G457_G460del         | Unknown<br>Pathogenicity |
| <i>ASXL1</i>                   | S214N                | Unknown<br>Pathogenicity |

|               |               |                          |
|---------------|---------------|--------------------------|
| <i>ASXL1</i>  | M1492V        | Unknown<br>Pathogenicity |
| <i>ATM</i>    | Amplification | Known<br>Pathogenicity   |
| <i>ATRX</i>   | S1913*        | Known<br>Pathogenicity   |
| <i>ATRX</i>   | E225*         | Known<br>Pathogenicity   |
| <i>ATRX</i>   | H475D         | Unknown<br>Pathogenicity |
| <i>AXIN1</i>  | R723*         | Unknown<br>Pathogenicity |
| <i>BAP1</i>   | P147L         | Unknown<br>Pathogenicity |
| <i>BARD1</i>  | F387L         | Unknown<br>Pathogenicity |
| <i>BCOR</i>   | L722F         | Unknown<br>Pathogenicity |
| <i>BCOR</i>   | T1696M        | Unknown<br>Pathogenicity |
| <i>BCORL1</i> | S1543L        | Unknown<br>Pathogenicity |

|                           |                      |                          |
|---------------------------|----------------------|--------------------------|
| <i>BRCA1</i>              | H839fs*7             | Known<br>Pathogenicity   |
| <i>BRCA2</i>              | S2887T               | Unknown<br>Pathogenicity |
| <i>CAMTA1 -<br/>WWTR1</i> | fusion               | Known<br>Pathogenicity   |
| <i>CASP8</i>              | K384Q                | Unknown<br>Pathogenicity |
| <i>CASP8</i>              | M1?                  | Unknown<br>Pathogenicity |
| <i>CCND3</i>              | R93*                 | Unknown<br>Pathogenicity |
| <i>CCT6B</i>              | splice site 615-2A>G | Known<br>Pathogenicity   |
| <i>CD36</i>               | M156I                | Unknown<br>Pathogenicity |
| <i>CD36</i>               | D244N                | Unknown<br>Pathogenicity |
| <i>CDKN2A</i>             | R80*                 | Known<br>Pathogenicity   |
| <i>CDKN2A</i>             | P81L                 | Known<br>Pathogenicity   |

|               |               |                          |
|---------------|---------------|--------------------------|
| <i>CDKN2A</i> | deletion      | Known<br>Pathogenicity   |
| <i>CDKN2A</i> | Amplification | Known<br>Pathogenicity   |
| <i>CDKN2A</i> | G101R         | Unknown<br>Pathogenicity |
| <i>CDKN2B</i> | deletion      | Known<br>Pathogenicity   |
| <i>CHEK2</i>  | T367fs*15     | Known<br>Pathogenicity   |
| <i>CIITA</i>  | V418A         | Unknown<br>Pathogenicity |
| <i>CIITA</i>  | A1032V        | Unknown<br>Pathogenicity |
| <i>CPS1</i>   | A347S         | Known<br>Pathogenicity   |
| <i>CRBN</i>   | I154R         | Unknown<br>Pathogenicity |
| <i>CSF1R</i>  | V117A         | Unknown<br>Pathogenicity |
| <i>DDX3X</i>  | A502T         | Known<br>Pathogenicity   |

|              |                       |                          |
|--------------|-----------------------|--------------------------|
| <i>DDX3X</i> | I166F                 | Unknown<br>Pathogenicity |
| <i>DKC1</i>  | K505_A506insK         | Unknown<br>Pathogenicity |
| <i>DTX1</i>  | Q291K                 | Unknown<br>Pathogenicity |
| <i>ECT2L</i> | R852Q                 | Known<br>Pathogenicity   |
| <i>EED</i>   | M15V                  | Unknown<br>Pathogenicity |
| <i>EPHA3</i> | C259*                 | Unknown<br>Pathogenicity |
| <i>EPHB1</i> | D602E                 | Unknown<br>Pathogenicity |
| <i>ERBB2</i> | R896H                 | Known<br>Pathogenicity   |
| <i>FANCA</i> | M160I                 | Known<br>Pathogenicity   |
| <i>FANCA</i> | splice site 3828+1G>C | Known<br>Pathogenicity   |
| <i>FANCL</i> | C132R                 | Unknown<br>Pathogenicity |



|               |               |                          |
|---------------|---------------|--------------------------|
| <i>FAS</i>    | E167K         | Unknown<br>Pathogenicity |
| <i>FAT3</i>   | V2757I        | Unknown<br>Pathogenicity |
| <i>FAT3</i>   | R258H         | Unknown<br>Pathogenicity |
| <i>FAT3</i>   | Y221C         | Unknown<br>Pathogenicity |
| <i>FBXO31</i> | P524L         | Unknown<br>Pathogenicity |
| <i>FBXW7</i>  | Amplification | Known<br>Pathogenicity   |
| <i>FGF4</i>   | Y166C         | Unknown<br>Pathogenicity |
| <i>GATA3</i>  | 359 C>T       | Unknown<br>Pathogenicity |
| <i>GNAS</i>   | Q332E         | Unknown<br>Pathogenicity |
| <i>GNAS</i>   | T415_G423del  | Unknown<br>Pathogenicity |
| <i>HGF</i>    | I306N         | Unknown<br>Pathogenicity |

|                 |                |                          |
|-----------------|----------------|--------------------------|
| <i>HIST1H1E</i> | K177_A184del   | Unknown<br>Pathogenicity |
| <i>HSP90AA1</i> | E365_E366insEK | Unknown<br>Pathogenicity |
| <i>HSP90AA1</i> | G7W            | Unknown<br>Pathogenicity |
| <i>ICK</i>      | Q240H          | Unknown<br>Pathogenicity |
| <i>IDH1</i>     | R119Q          | Known<br>Pathogenicity   |
| <i>IGF1R</i>    | D675N          | Unknown<br>Pathogenicity |
| <i>IKZF3</i>    | R458C          | Unknown<br>Pathogenicity |
| <i>INPP5D</i>   | F846S          | Unknown<br>Pathogenicity |
| <i>JARID2</i>   | P139T          | Unknown<br>Pathogenicity |
| <i>KDM4C</i>    | A305S          | Unknown<br>Pathogenicity |
| <i>KDM5C</i>    | P1429L         | Known<br>Pathogenicity   |

|               |            |                          |
|---------------|------------|--------------------------|
| <i>KEAP1</i>  | F478fs*2   | Known<br>Pathogenicity   |
| <i>KMT2A</i>  | P1767fs*53 | Unknown<br>Pathogenicity |
| <i>KMT2C</i>  | D2201H     | Known<br>Pathogenicity   |
| <i>KMT2C</i>  | A374V      | Unknown<br>Pathogenicity |
| <i>KMT2C</i>  | P840H      | Unknown<br>Pathogenicity |
| <i>KMT2D</i>  | R4238H     | Unknown<br>Pathogenicity |
| <i>LRP1B</i>  | R4363G     | Unknown<br>Pathogenicity |
| <i>LRRK2</i>  | V2495I     | Known<br>Pathogenicity   |
| <i>LRRK2</i>  | M2155L     | Unknown<br>Pathogenicity |
| <i>LRRK2</i>  | C2154F     | Unknown<br>Pathogenicity |
| <i>MAP2K2</i> | I14S       | Unknown<br>Pathogenicity |

|                |                 |                          |
|----------------|-----------------|--------------------------|
| <i>MAP3K1</i>  | V569I           | Known<br>Pathogenicity   |
| <i>MAP3K13</i> | D601A           | Unknown<br>Pathogenicity |
| <i>MED12</i>   | Q2076_Y2077insQ | Unknown<br>Pathogenicity |
| <i>MEF2B</i>   | L251F           | Unknown<br>Pathogenicity |
| <i>MKI67</i>   | E1487V          | Unknown<br>Pathogenicity |
| <i>MKI67</i>   | I2958T          | Unknown<br>Pathogenicity |
| <i>MKI67</i>   | D751E           | Unknown<br>Pathogenicity |
| <i>MLH1</i>    | E605*           | Known<br>Pathogenicity   |
| <i>MLH1</i>    | R9G             | Unknown<br>Pathogenicity |
| <i>MSH2</i>    | E358D           | Unknown<br>Pathogenicity |
| <i>MSH3</i>    | K255*           | Known<br>Pathogenicity   |

|               |               |                          |
|---------------|---------------|--------------------------|
| <i>MSH3</i>   | A57_A62del    | Unknown<br>Pathogenicity |
| <i>MUTYH</i>  | G382D         | Known<br>Pathogenicity   |
| <i>MYO18A</i> | A1314T        | Unknown<br>Pathogenicity |
| <i>NCOR1</i>  | V2293M        | Unknown<br>Pathogenicity |
| <i>NCOR2</i>  | E859A         | Unknown<br>Pathogenicity |
| <i>NCOR2</i>  | A775T         | Unknown<br>Pathogenicity |
| <i>NFKBIA</i> | amplification | Known<br>Pathogenicity   |
| <i>NOD1</i>   | F515fs*228    | Known<br>Pathogenicity   |
| <i>NOD1</i>   | A829G         | Unknown<br>Pathogenicity |
| <i>NOTCH1</i> | 3835C>T       | Known<br>Pathogenicity   |
| <i>NOTCH1</i> | R1132C        | Unknown<br>Pathogenicity |

|                 |        |                          |
|-----------------|--------|--------------------------|
| <i>NOTCH2</i>   | G2291W | Unknown<br>Pathogenicity |
| <i>NOTCH3</i>   | R75W   | Unknown<br>Pathogenicity |
| <i>NTRK1</i>    | splice | Unknown<br>Pathogenicity |
| <i>NUP98</i>    | E948D  | Unknown<br>Pathogenicity |
| <i>PASK</i>     | G327S  | Unknown<br>Pathogenicity |
| <i>PC</i>       | M1145I | Unknown<br>Pathogenicity |
| <i>PCBP1</i>    | T91I   | Unknown<br>Pathogenicity |
| <i>PDCD1LG2</i> | T217S  | Unknown<br>Pathogenicity |
| <i>PIK3CA</i>   | N515S  | Known<br>Pathogenicity   |
| <i>PIK3CA</i>   | R949Q  | Unknown<br>Pathogenicity |
| <i>PMS2</i>     | S46N   | Known<br>Pathogenicity   |

|               |          |                          |
|---------------|----------|--------------------------|
| <i>POT1</i>   | D617fs*9 | Known<br>Pathogenicity   |
| <i>PTCH1</i>  | G51del   | Unknown<br>Pathogenicity |
| <i>RAD50</i>  | E1232A   | Unknown<br>Pathogenicity |
| <i>RAD51C</i> | R24Q     | Unknown<br>Pathogenicity |
| <i>RARA</i>   | T179M    | Unknown<br>Pathogenicity |
| <i>RB1</i>    | R320*    | Known<br>Pathogenicity   |
| <i>RB1</i>    | deletion | Known<br>Pathogenicity   |
| <i>RB1</i>    | G203W    | Unknown<br>Pathogenicity |
| <i>RELN</i>   | T1916A   | Unknown<br>Pathogenicity |
| <i>RELN</i>   | L1732F   | Unknown<br>Pathogenicity |
| <i>RELN</i>   | G937A    | Unknown<br>Pathogenicity |

|                |                       |                          |
|----------------|-----------------------|--------------------------|
| <i>RELN</i>    | K3100del              | Unknown<br>Pathogenicity |
| <i>RICTOR</i>  | P1397H                | Unknown<br>Pathogenicity |
| <i>ROS1</i>    | G1196R                | Known<br>Pathogenicity   |
| <i>ROS1</i>    | R2269*                | Unknown<br>Pathogenicity |
| <i>ROS1</i>    | E2244Q                | Unknown<br>Pathogenicity |
| <i>RPS19</i>   | R102Q                 | Unknown<br>Pathogenicity |
| <i>RUNX1</i>   | A187T                 | Unknown<br>Pathogenicity |
| <i>SETBP1</i>  | R11Q                  | Unknown<br>Pathogenicity |
| <i>SGK1</i>    | R12Q                  | Unknown<br>Pathogenicity |
| <i>SMARCA4</i> | splice site 4911+1G>A | Known<br>Pathogenicity   |
| <i>SMARCA4</i> | K892R                 | Unknown<br>Pathogenicity |



|              |               |                          |
|--------------|---------------|--------------------------|
| <i>SMC1A</i> | S1188C        | Unknown<br>Pathogenicity |
| <i>TAF1</i>  | K424R         | Unknown<br>Pathogenicity |
| <i>TCF3</i>  | M415V         | Unknown<br>Pathogenicity |
| <i>TERT</i>  | Amplification | Known<br>Pathogenicity   |
| <i>TET2</i>  | 100C>T        | Known<br>Pathogenicity   |
| <i>TOP1</i>  | I133V         | Unknown<br>Pathogenicity |
| <i>TP63</i>  | N467S         | Unknown<br>Pathogenicity |
| <i>TRAF3</i> | V47M          | Unknown<br>Pathogenicity |
| <i>TSC1</i>  | 3185G>A       | Known<br>Pathogenicity   |
| <i>TSC2</i>  | R1159Q        | Unknown<br>Pathogenicity |
| <i>TSC2</i>  | K351R         | Unknown<br>Pathogenicity |

|               |                            |                          |
|---------------|----------------------------|--------------------------|
| <i>TYK2</i>   | R281S                      | Unknown<br>Pathogenicity |
| <i>TYK2</i>   | M8L                        | Unknown<br>Pathogenicity |
| <i>YY1AP1</i> | C42_R45>C                  | Unknown<br>Pathogenicity |
| <i>ZNF217</i> | N55fs*31                   | Unknown<br>Pathogenicity |
| <i>ZNF703</i> | amplification              | Known<br>Pathogenicity   |
| <i>ZNF703</i> | H402_D403>PTHLGGSSCSTCSAHD | Unknown<br>Pathogenicity |

eFigure 2: Age At Diagnosis

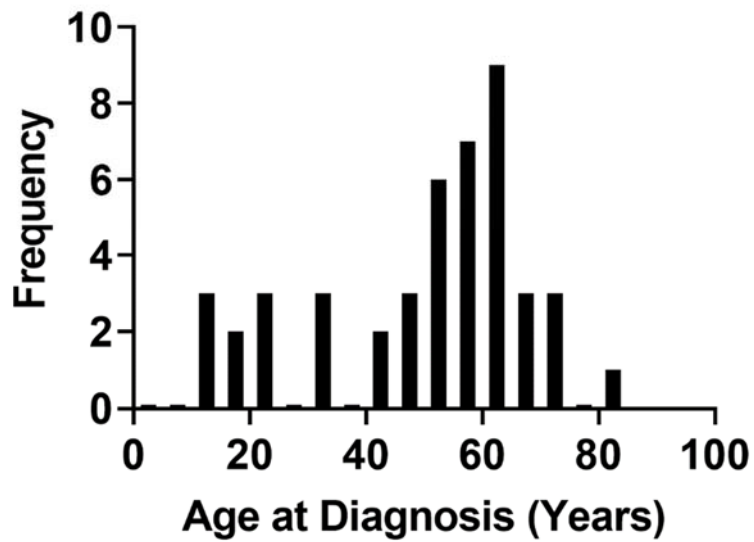

In 45 EHE subjects with data available, mean age at diagnosis was 50.2 years of age with an apparent bimodal distribution around the 45 year mark.

### eMethods: Models

Utilizing the `mclust` package in R v.3.4.3, a Gaussian finite mixture model was fit to the data. A second forced a one-compartment model was then fit to the same data. These two models were then tested by calculating the difference in model fit by a log-likelihood ratio test (Log-likelihood one-component model -207.2 vs two-component model -197.6, difference 9.6, 95%CI 0.0-23.8,  $p=0.02$ ). The 95% confidence interval (95%CI) was generated by bootstrapping the model comparison for 1,000 iterations. Statistical significance here suggests the distribution of the tested data is significantly different than a one-compartment model distribution.

eTable 4: Clinicogenomic Features of *CDKN2A/B* Variant Subjects

| eTable 4: Clinicogenomic Features of <i>CDKN2A/B</i> Variant Subjects |        |        |        |          |          |          |          |
|-----------------------------------------------------------------------|--------|--------|--------|----------|----------|----------|----------|
| Case                                                                  | #1     | #2     | #3     | #4       | #5       | #6       | #7       |
| Age at Diagnosis (year)                                               | 51     | 56     | 11     | 50       | 53       | 70       | 65       |
| Gender                                                                | Female | Male   | Female | Female   | Male     | Male     | Female   |
| TMB                                                                   | 2.4    | 0.8    | 0.8    | 0.8      | 0        | 0.8      | 2.4      |
| Microsatellite Instability (MSI)                                      | Stable | Stable | Stable | N/A      | N/A      | Stable   | Stable   |
| <i>WWTR1-CAMTA1</i> Expression                                        | 566    | 63     | 69     | 97       | 194      | 550      | 1376     |
| <i>CDKN2A</i>                                                         | R80*   | P81L   | G101R  | Deletion | Deletion | Deletion | Deletion |
| <i>CDKN2B</i>                                                         | -      | -      | -      | Deletion | Deletion | Deletion | Deletion |
| <i>APC</i>                                                            |        |        |        |          |          |          | Q1549K   |
| <i>ATRX</i>                                                           |        |        | H475D  |          |          |          |          |

|                 |                          |           |  |        |  |       |                  |
|-----------------|--------------------------|-----------|--|--------|--|-------|------------------|
| <i>AXIN1</i>    |                          |           |  |        |  | R723* |                  |
| <i>BARD1</i>    | F387L                    |           |  |        |  |       |                  |
| <i>BCOR</i>     | L722F                    |           |  |        |  |       |                  |
| <i>BRCA1</i>    | H839fs*7                 |           |  |        |  |       |                  |
| <i>BRCA2</i>    | S2887T                   |           |  |        |  |       |                  |
| <i>DDX3X</i>    |                          |           |  |        |  |       | I166F            |
| <i>FANCA</i>    |                          |           |  |        |  |       | M160I            |
| <i>FAS</i>      | E167K                    |           |  |        |  |       |                  |
| <i>FAT3</i>     |                          |           |  |        |  |       | Y221C            |
| <i>HIST1H1E</i> |                          |           |  |        |  |       | K177_A1<br>84del |
| <i>IDH1</i>     |                          |           |  |        |  |       | R119Q            |
| <i>MKI67</i>    |                          |           |  | E1487V |  |       |                  |
| <i>MSH3</i>     | K255*;<br>A57_A62<br>del |           |  |        |  |       |                  |
| <i>NCOR2</i>    |                          |           |  | E859A  |  |       |                  |
| <i>NFKBIA</i>   |                          |           |  |        |  |       | Amplification    |
| <i>SMARCA4</i>  |                          | K892<br>R |  |        |  |       |                  |
| <i>TP63</i>     |                          |           |  |        |  | N467S |                  |
| <i>TSC2</i>     |                          |           |  | R1159Q |  |       |                  |

|        |  |  |  |               |  |  |  |
|--------|--|--|--|---------------|--|--|--|
| YY1AP1 |  |  |  | C42_R45<br>>C |  |  |  |
|--------|--|--|--|---------------|--|--|--|

eTable 5: Targetable Genomic Variants

| etable 5: Targetable Genomic Variants |                              |           |                          |
|---------------------------------------|------------------------------|-----------|--------------------------|
| Gene                                  | Subjects With Alteration (%) |           | OncoKB Level of Evidence |
|                                       | Know Variant                 | VUS       |                          |
| <i>ROS1</i>                           | 1 (2%)                       | 2 (4.1%)  | Level 1                  |
| <i>TSC1</i>                           | 1 (2%)                       | 0 (0%)    | Level 1                  |
| <i>TSC2</i>                           | 0 (0%)                       | 2 (4.1%)  | Level 1                  |
| <i>NTRK1</i>                          | 0 (0%)                       | 1 (2%)    | Level 1                  |
| <i>BRCA1</i>                          | 1 (2%)                       | 0 (0%)    | Level 1                  |
| <i>BRCA2</i>                          | 0 (0%)                       | 1 (2%)    | Level 1                  |
| <i>ERBB2</i>                          | 1 (2%)                       | 0 (0%)    | Level 1                  |
| <i>IDH1</i>                           | 1 (2%)                       | 0 (0%)    | Level 1                  |
| <i>PTCH1</i>                          | 0 (0%)                       | 1 (2%)    | Level 3                  |
| <i>CDKN2A</i>                         | 6 (12.2%)                    | 1 (2%)    | Level 4                  |
| Total                                 | 9 (18.4%)                    | 6 (12.2%) |                          |
